# Supplementary material
Source: publisher figshare collection journal article supplement (https://diabetesjournals.figshare.com/articles/dataset/_/13681747)

Type 2 diabetes subgroups, risk for complications, and differential effects due to an intensive lifestyle intervention

Michael P. Bancks, PhD, Wake Forest School of Medicine

Haiying Chen, PhD, Wake Forest School of Medicine

Ashok Balasubramanyam, MD, Baylor College of Medicine

Alain G. Bertoni, MD, Wake Forest School of Medicine

Mark A. Espeland, PhD, Wake Forest School of Medicine

Steven E. Kahn, MB, ChB, VA Puget Sound Health Care System and University of Washington, Seattle, WA

Scott Pilla, MD, Johns Hopkins School of Medicine

Elizabeth Vaughan, DO, Baylor College of Medicine

Lynne E. Wagenknecht, DrPH, Wake Forest School of Medicine  
and the Look AHEAD Research Group

Corresponding author: Mike Bancks, [mbancks@wakehealth.edu](mailto:mbancks@wakehealth.edu), Telephone: +1-336-716-9736,  
Wake Forest School of Medicine, Division of Public Health Sciences, Department of  
Epidemiology & Prevention, One Medical Center Boulevard, Winston-Salem, NC, 27157.  
ORCID iD: 0000-0003-3694-6060

Supplemental Material

**Supplemental table 1.** Incidence of death and the individual cardiovascular outcomes in the Look AHEAD trial according to intervention arm and diabetes subgroup

|                                                   | <b>Older onset</b> |           | <b>Poor glucose control</b> |          | <b>Severe obesity</b> |          | <b>Younger onset</b> |          |
|---------------------------------------------------|--------------------|-----------|-----------------------------|----------|-----------------------|----------|----------------------|----------|
|                                                   | ILI                | DSE       | ILI                         | DSE      | ILI                   | DSE      | ILI                  | DSE      |
| Individuals, n                                    | 1082               | 1096      | 342                         | 374      | 618                   | 604      | 528                  | 501      |
| Death, events / person-years                      | 72 /9841           | 84 /9962  | 29 /3145                    | 39 /3326 | 48 /5695              | 54 /5509 | 25 /5021             | 25 /4754 |
| Incidence rate per 1000 person-years              | 7.3                | 8.4       | 9.2                         | 11.7     | 8.4                   | 9.8      | 5.0                  | 5.3      |
| Cumulative incidence                              | 6.7%               | 7.7%      | 8.5%                        | 10.4%    | 7.8%                  | 8.9%     | 4.7%                 | 5.0%     |
| Myocardial infarction, events / person-years      | 73 /9504           | 87 /9620  | 32 /3017                    | 29 /3205 | 32 /5574              | 41 /5351 | 26 /4926             | 34 /4626 |
| Incidence rate per 1000 person-years              | 7.7                | 9.0       | 10.6                        | 9.0      | 5.7                   | 7.7      | 5.3                  | 7.4      |
| Cumulative incidence                              | 6.7%               | 7.9%      | 9.4%                        | 7.8%     | 5.2%                  | 6.8%     | 4.9%                 | 6.8%     |
| Hospitalization for angina, events / person-years | 77 /9495           | 82 /9550  | 41 /2946                    | 25 /3216 | 45 /5483              | 51 /5271 | 31 /4872             | 38 /4552 |
| Incidence rate per 1000 person-years              | 8.1                | 8.6       | 13.9                        | 7.8      | 8.2                   | 9.7      | 6.4                  | 8.3      |
| Cumulative incidence                              | 7.1%               | 7.5%      | 12.0%                       | 6.7%     | 7.3%                  | 8.4%     | 5.9%                 | 7.6%     |
| Stroke, events / person-years                     | 28 /9737           | 35 /9831  | 19 /3089                    | 12 /3279 | 18 /5619              | 19 /5436 | 20 /4968             | 14 /4699 |
| Incidence rate per 1000 person-years              | 2.9                | 3.6       | 6.2                         | 3.7      | 3.2                   | 3.5      | 4.0                  | 3.0      |
| Cumulative incidence                              | 2.6%               | 3.2%      | 5.6%                        | 3.2%     | 2.9%                  | 3.1%     | 3.8%                 | 2.8%     |
| Heart failure, events / person-years              | 37 /9707           | 46 /9808  | 22 /3062                    | 26 /3222 | 31 /5576              | 32 /5384 | 9 /4993              | 15 /4697 |
| Incidence rate per 1000 person-years              | 3.8                | 4.7       | 7.2                         | 8.1      | 5.6                   | 5.9      | 1.8                  | 3.2      |
| Cumulative incidence                              | 3.4%               | 4.2%      | 6.4%                        | 7.0%     | 5.0%                  | 5.3%     | 1.7%                 | 3.0%     |
| CABG, events / person-years                       | 118 /9252          | 115 /9401 | 46 /2903                    | 39 /3179 | 52 /5436              | 67 /5181 | 40 /4824             | 48 /4525 |
| Incidence rate per 1000 person-years              | 12.8               | 12.2      | 15.8                        | 12.3     | 9.6                   | 12.9     | 8.3                  | 10.6     |
| Cumulative incidence                              | 10.9%              | 10.5%     | 13.5%                       | 10.4%    | 8.4%                  | 11.1%    | 7.6%                 | 9.6%     |
| Carotid endarterectomy, events / person-years     | 16 /9756           | 12 /9904  | 5 /3127                     | 2 /3320  | 3 /5677               | 7 /5476  | 5 /5012              | 4 /4726  |
| Incidence rate per 1000 person-years              | 1.6                | 1.2       | 1.6                         | 0.6      | 0.5                   | 1.3      | 1.0                  | 0.8      |
| Cumulative incidence                              | 1.5%               | 1.1%      | 1.5%                        | 0.5%     | 0.5%                  | 1.2%     | 0.9%                 | 0.8%     |
| PVD, events / person-years                        | 25 /9742           | 16 /9906  | 6 /3121                     | 10 /3297 | 7 /5663               | 5 /5499  | 5 /5000              | 7 /4723  |
| Incidence rate per 1000 person-years              | 2.6                | 1.6       | 1.9                         | 3.0      | 1.2                   | 0.9      | 1.0                  | 1.5      |
| Cumulative incidence                              | 2.3%               | 1.5%      | 1.8%                        | 2.7%     | 1.1%                  | 0.8%     | 0.9%                 | 1.4%     |

\*Abbreviations: CABG, coronary-artery bypass grafting; DSE, Diabetes support and education; ILI, Intensive lifestyle intervention; PVD, peripheral vascular disease

**Supplemental table 2.** Hazard ratios and 95% confidence intervals for the intensive lifestyle intervention on the Look AHEAD trial individual cardiovascular outcomes and death according to diabetes subgroup

|                                 | <b>Older onset</b> | <b>Poor glucose control</b> | <b>Severe obesity</b> | <b>Younger onset</b> |
|---------------------------------|--------------------|-----------------------------|-----------------------|----------------------|
| Death                           | 0.85 (0.62, 1.17)  | 0.82 (0.50, 1.32)           | 0.81 (0.54, 1.19)     | 0.93 (0.54, 1.63)    |
| Myocardial infarction           | 0.84 (0.62, 1.15)  | 1.21 (0.73, 2.02)           | 0.70 (0.44, 1.12)     | 0.76 (0.45, 1.26)    |
| Hospitalization for angina      | 0.94 (0.69, 1.28)  | 1.95 (1.18, 3.23)           | 0.81 (0.54, 1.21)     | 0.80 (0.50, 1.29)    |
| Stroke                          | 0.78 (0.47, 1.29)  | 1.84 (0.89, 3.80)           | 0.88 (0.46, 1.69)     | 1.31 (0.66, 2.60)    |
| Heart failure                   | 0.78 (0.50, 1.20)  | 0.98 (0.55, 1.75)           | 0.89 (0.54, 1.46)     | 0.59 (0.26, 1.38)    |
| Coronary-artery bypass grafting | 1.04 (0.80, 1.34)  | 1.36 (0.88, 2.09)           | 0.69 (0.48, 0.99)     | 0.80 (0.52, 1.22)    |
| Carotid endarterectomy          | 1.34 (0.63, 2.83)  | 3.27 (0.61, 17.4)           | 0.29 (0.07, 1.16)     | 1.05 (0.28, 3.94)    |
| Peripheral vascular disease     | 1.60 (0.86, 3.01)  | 0.64 (0.23, 1.77)           | 1.32 (0.41, 4.24)     | 0.75 (0.24, 2.39)    |

**Supplemental Figure 1.** Change in weight during 10 years of follow-up according to intervention arm and diabetes subgroup (singular overset and underset diamonds indicate  $p < 0.05$  for intervention arm comparison within subgroup)

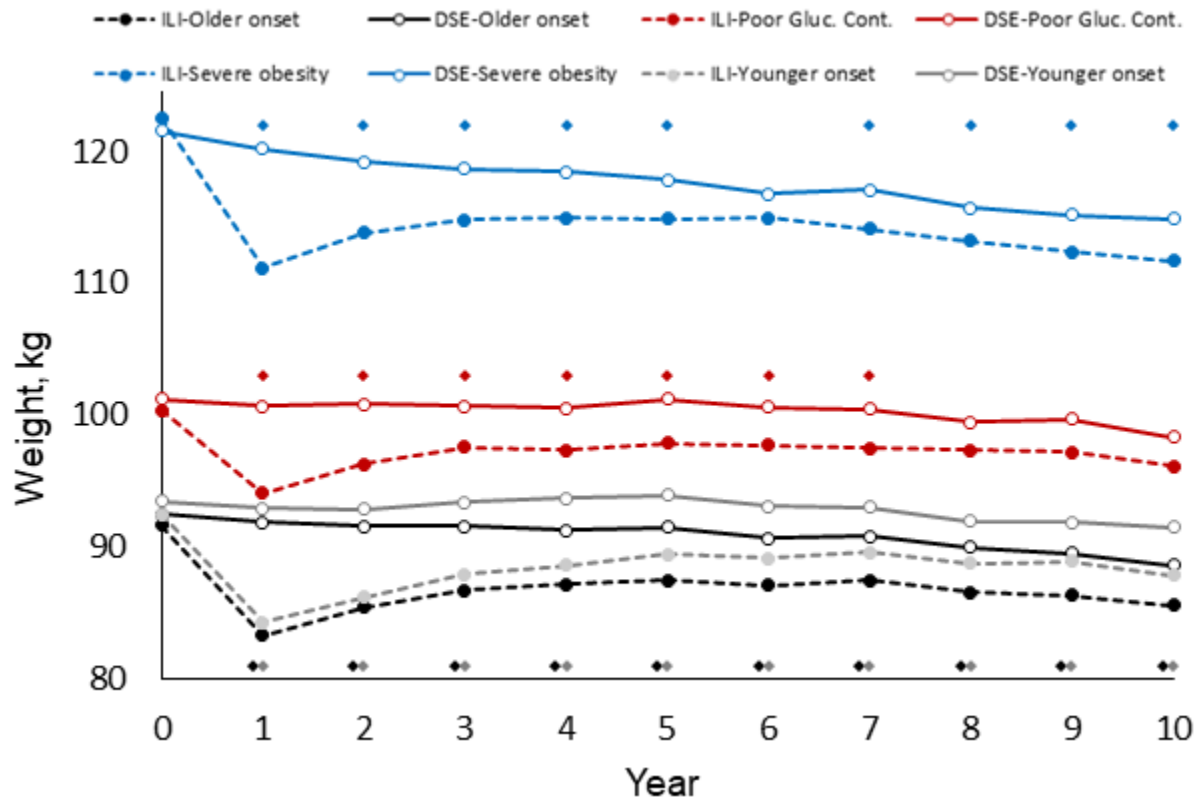

**Supplemental Figure 2.** Change in waist circumference during 10 years of follow-up according to intervention arm and diabetes subgroup (singular overset and underset diamonds indicate  $p < 0.05$  for intervention arm comparison within subgroup)

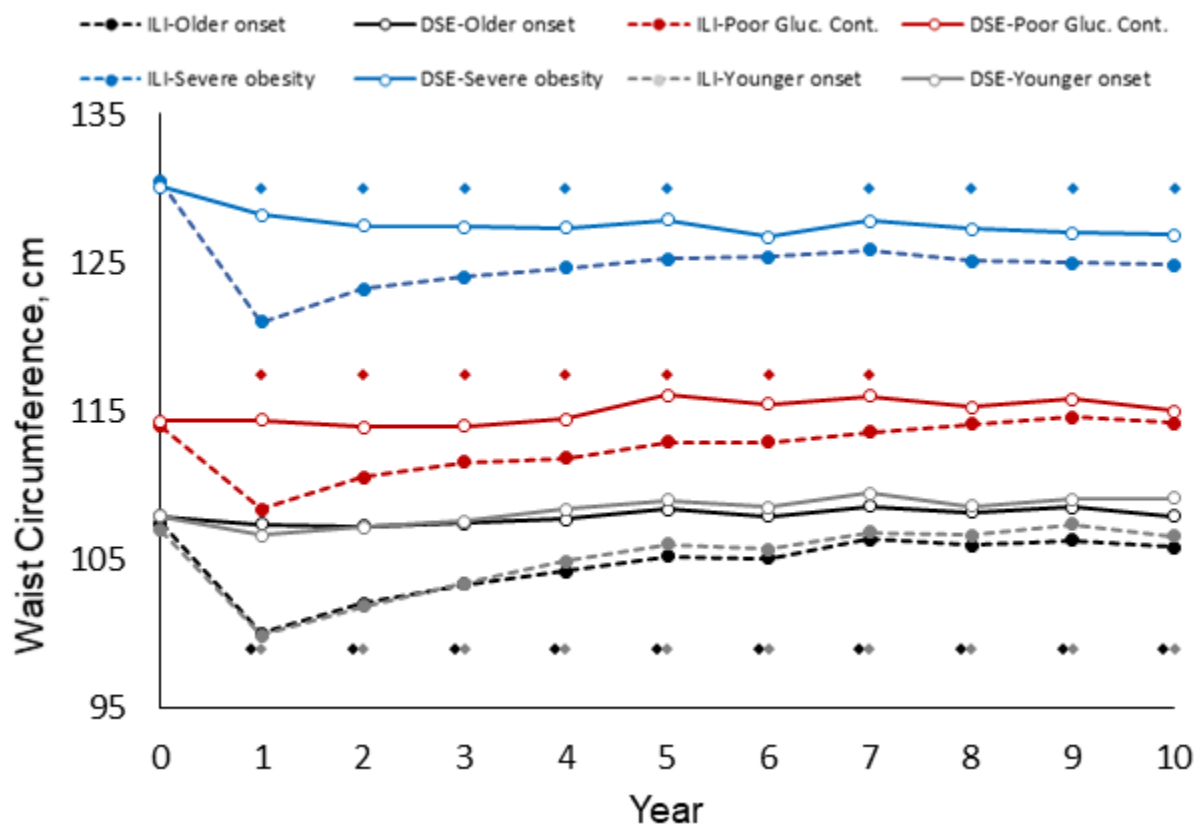

**Supplemental Figure 3.** Change in glycated hemoglobin (HbA1c) during 10 years of follow-up according to intervention arm and diabetes subgroup (singular overset and underset diamonds indicate  $p < 0.05$  for intervention arm comparison within subgroup)

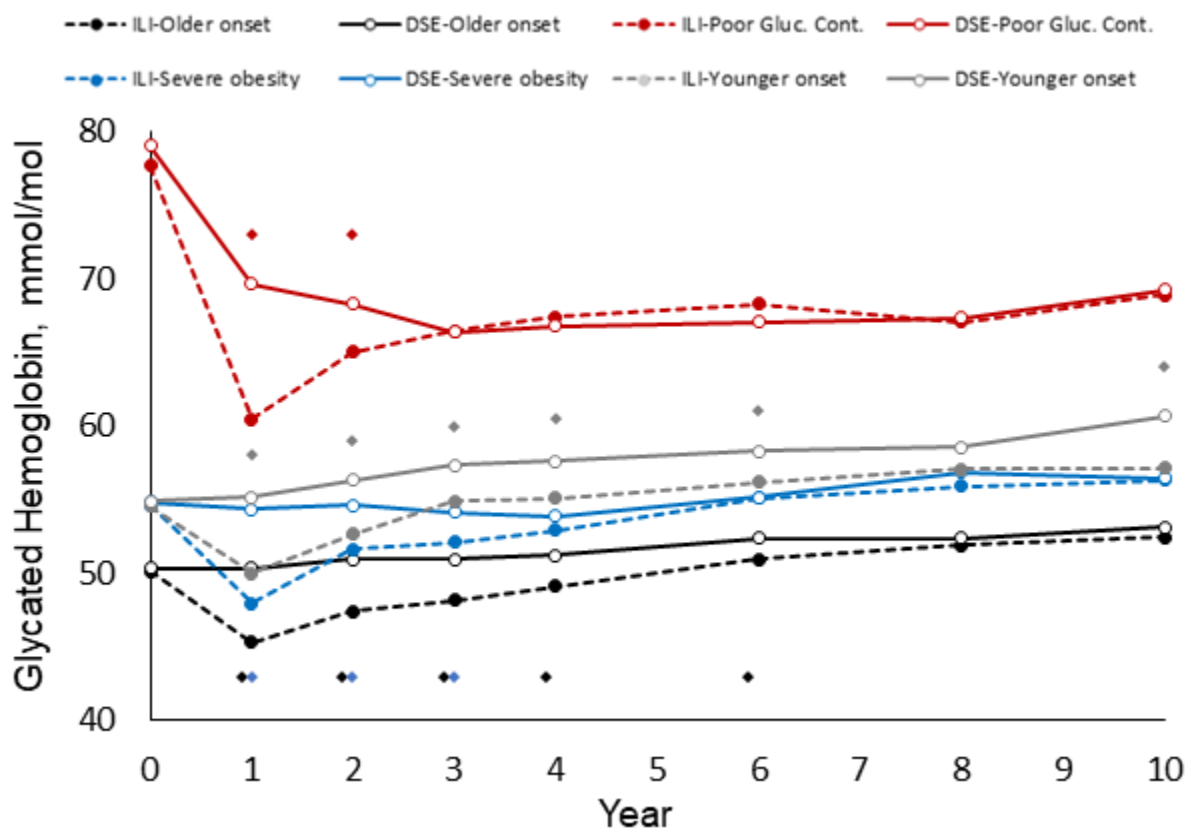

**Supplemental Figure 4.** Change in systolic blood pressure during 10 years of follow-up according to intervention arm and diabetes subgroup (singular overset and underset diamonds indicate  $p < 0.05$  for intervention arm comparison within subgroup)

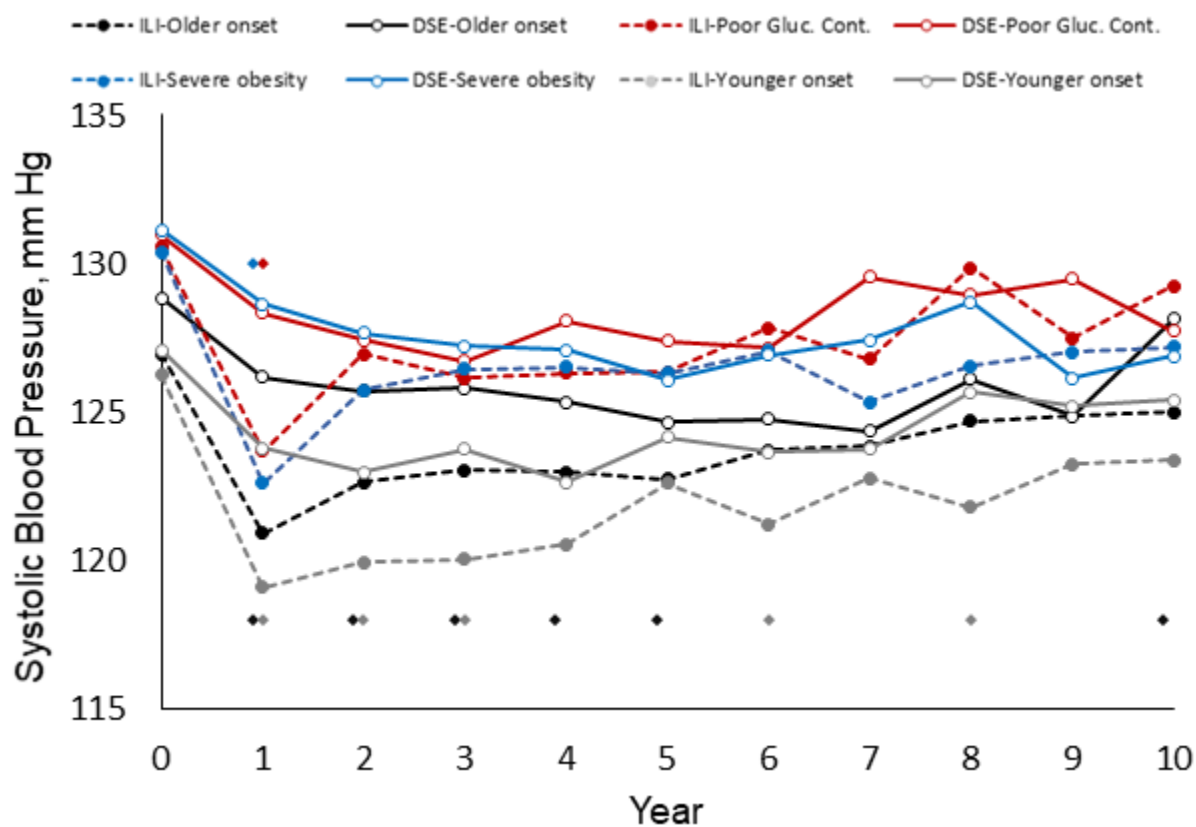



**Supplemental Figure 5.** Change in diastolic blood pressure during 10 years of follow-up according to intervention arm and diabetes subgroup (singular overset and underset diamonds indicate  $p < 0.05$  for intervention arm comparison within subgroup)

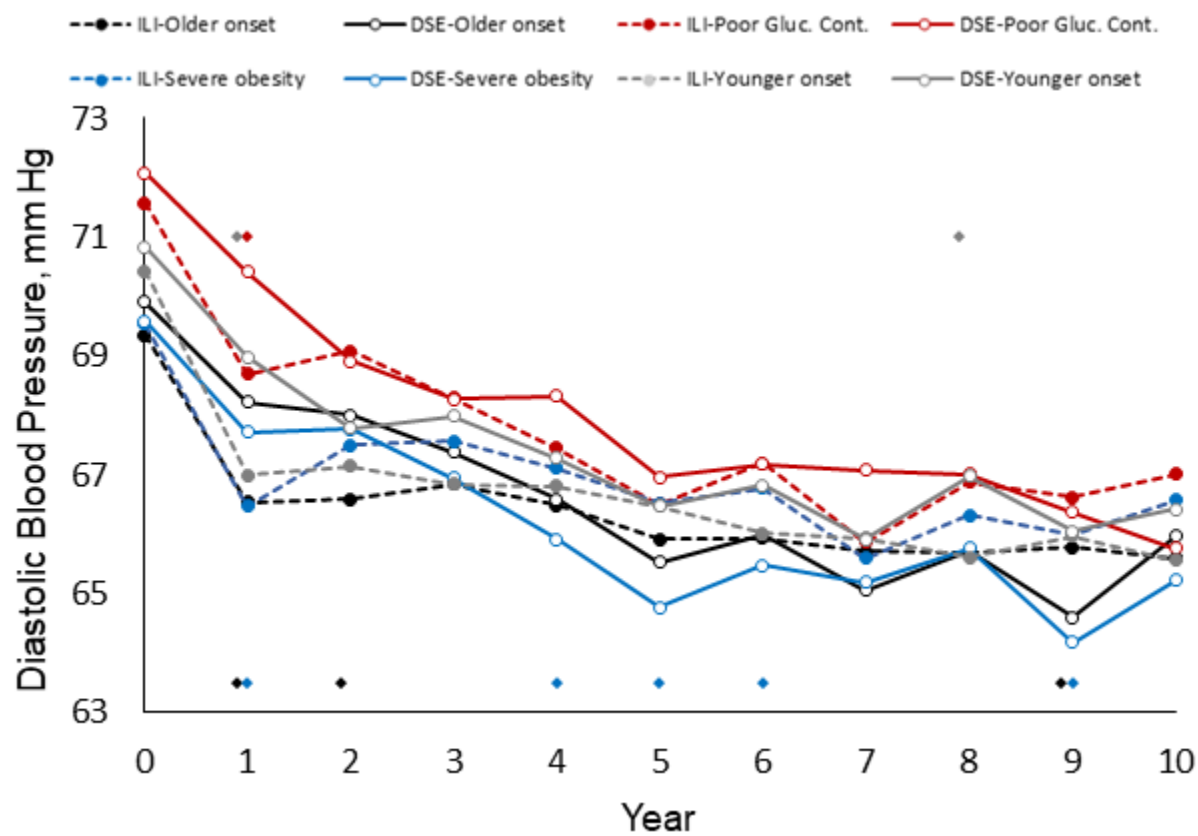

**Supplemental Figure 6.** Change in high-density lipoprotein cholesterol during 10 years of follow-up according to intervention arm and diabetes subgroup (singular overset and underset diamonds indicate  $p < 0.05$  for intervention arm comparison within subgroup)

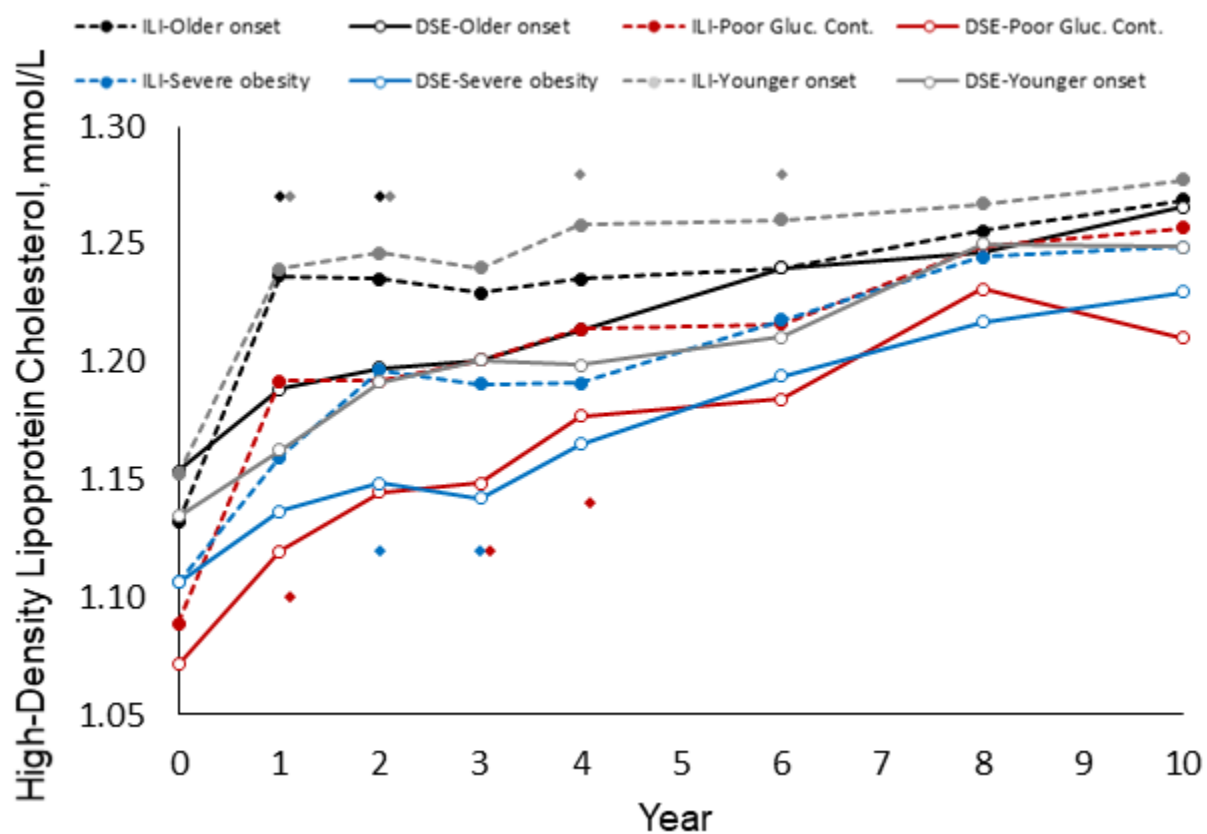

**Supplemental Figure 7.** Change in low-density lipoprotein cholesterol during 10 years of follow-up according to intervention arm and diabetes subgroup (singular overset and underset diamonds indicate  $p < 0.05$  for intervention arm comparison within subgroup)

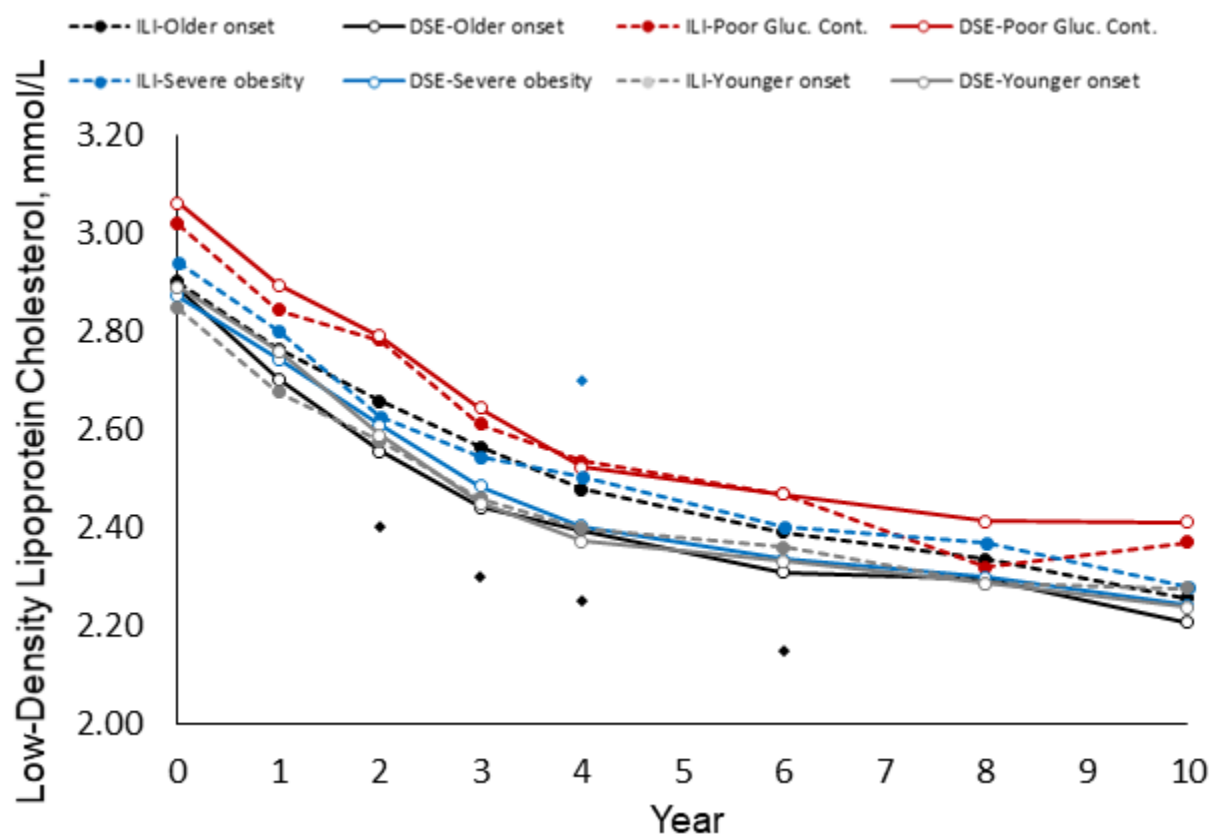

**Supplemental Figure 8.** Forest plot of hazard ratios and 95% confidence intervals for the intensive lifestyle intervention on the Look AHEAD trial primary cardiovascular outcome, secondary cardiovascular composite outcomes, and the individual cardiovascular outcomes and death among 4429 participants pooled from the older age at onset, severe obesity, and younger age at onset diabetes subgroup (excluding the poor glucose control subgroup)

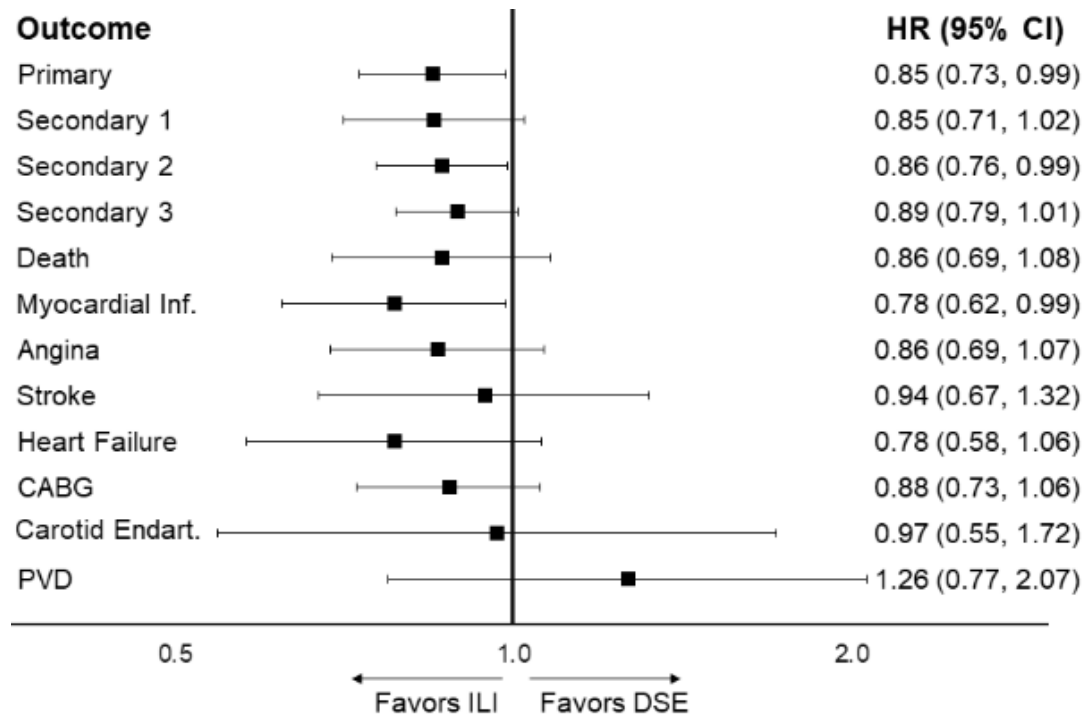

Supplement: Supplementary file 1 [file 1]
